# Supplementary material
Source: PubMed Central journal article supplement (PMC5948157)
Supplement: NIHMS951167-supplement-Table_1.pdf [file NIHMS951167-supplement-Table_1.pdf]

**Supplementary Table 1. Crude odds ratios and 95%CI, obtained through univariate GEE modeling, for urinary continence according to selected variables. The National Spina Bifida Patient Registry, 2009-2015 (n=5,250)**

| <b>Variables</b>                             | <b>Odds Ratio (95% CI)</b> | <b>P-value</b>      |
|----------------------------------------------|----------------------------|---------------------|
| <b>Age at visit</b>                          |                            |                     |
| 5 year increase                              | 1.1 (1.1 - 1.2)            | <0.001              |
| <b>Age group</b>                             |                            | <0.001 <sup>‡</sup> |
| 5 to <12                                     | Reference                  |                     |
| 12 to <20                                    | 1.5 (1.4 - 1.6)            | <0.001              |
| 20 or older                                  | 1.8 (1.7 - 2.1)            | <0.001              |
| <b>Gender</b>                                |                            |                     |
| Male                                         | Reference                  |                     |
| Female                                       | 1.4 (1.3 - 1.6)            | <0.001              |
| <b>Race/Ethnicity (21 missing)</b>           |                            | <0.001 <sup>‡</sup> |
| Non-Hispanic White <sup>†</sup>              |                            |                     |
| Non-Hispanic Black                           | 0.5 (0.4 - 0.6)            | <0.001              |
| Hispanic or Latino                           | 0.7 (0.6 - 0.8)            | <0.001              |
| Other                                        | 1.0 (0.8 - 1.2)            | 0.91                |
| <b>Spina bifida type</b>                     |                            |                     |
| Myelomeningocele                             | Reference                  |                     |
| Other diagnosis                              | 2.5 (2.2 - 2.8)            | <0.001              |
| <b>History of bladder continence surgery</b> |                            |                     |
| No                                           | Reference                  |                     |
| Yes                                          | 1.9 (1.7 - 2.1)            | <0.001              |
| <b>Any bladder management (37 missing)</b>   |                            |                     |
| No                                           | Reference                  |                     |
| Yes                                          | 4.0 (3.4 - 4.8)            | <0.001              |
| <b>Level of lesion</b>                       |                            | <0.001 <sup>‡</sup> |
| Thoracic                                     | Reference                  |                     |
| Lumbar                                       | 0.9 (0.8 - 1.1)            | 0.32                |
| Sacral                                       | 1.7 (1.5 - 1.9)            | <0.001              |
| <b>Mobility status</b>                       |                            | <0.001 <sup>‡</sup> |
| Community Ambulators                         | Reference                  |                     |
| Household Ambulators                         | 0.7 (0.6 - 0.8)            | <0.001              |
| Non-Functional Ambulators                    | 0.6 (0.5 - 0.7)            | <0.001              |
| Non-Ambulators                               | 0.7 (0.6 - 0.7)            | <0.001              |
| <b>Health insurance (4 missing)</b>          |                            |                     |
| Any private                                  | Reference                  |                     |
| Non-private                                  | 0.7 (0.6 - 0.7)            | <0.001              |

<sup>‡</sup> : Overall p-value
