# Supplementary material
Source: PubMed Central journal article supplement (PMC5948157)
Supplement: NIHMS951167-supplement-Table_2.pdf [file NIHMS951167-supplement-Table_2.pdf]

**Supplementary Table 2. Summary of 10,000 runs of selection bias analysis for bladder continence status. The National Spina Bifida Patient Registry, 2015 visits**

| Variables                   | SPR, median (2.5, 97.5 percentiles)              |                 | Estimate<br>of bias<br>(median<br>RSPR*) | Observed OR<br>(95% CI)**                                 | Adjusted OR<br>(95% CI)                                                           |
|-----------------------------|--------------------------------------------------|-----------------|------------------------------------------|-----------------------------------------------------------|-----------------------------------------------------------------------------------|
|                             | Continent                                        | Incontinent     |                                          |                                                           |                                                                                   |
|                             | Odds of enrollment compared with referent group. |                 | Likelihood of being enrolled continent   | Odds of being continent compared with the reference group | Odds of being continent compared with the reference group adjusted for enrollment |
| <b>Age (years)</b>          |                                                  |                 |                                          |                                                           |                                                                                   |
| < 10 <sup>†</sup>           |                                                  |                 |                                          |                                                           |                                                                                   |
| 10 to <18                   | 1.0 (0.8, 1.2)                                   | 1.0 (0.9, 1.1)  | 1.0                                      | 2.8 (2.4, 3.3)                                            | 2.9 (2.4, 3.4)                                                                    |
| 18 or older                 | 0.9 (0.7, 1.0)                                   | 0.8 (0.7, 0.9)  | 1.2                                      | 3.9 (3.3, 4.7)                                            | 3.4 (2.8, 4.1)                                                                    |
| <b>Sex</b>                  |                                                  |                 |                                          |                                                           |                                                                                   |
| Male <sup>†</sup>           |                                                  |                 |                                          |                                                           |                                                                                   |
| Female                      | 1.0 (0.9, 1.2)                                   | 1.09 (1.0, 1.2) | 1.0                                      | 1.5 (1.3, 1.7)                                            | 1.5 (1.3, 1.8)                                                                    |
| <b>Type of SB diagnoses</b> |                                                  |                 |                                          |                                                           |                                                                                   |
| MMC <sup>†</sup>            |                                                  |                 |                                          |                                                           |                                                                                   |
| NMMC                        | 0.6 (0.5, 0.7)                                   | 0.6 (0.5, 0.6)  | 1.1                                      | 2.8 (2.3, 3.3)                                            | 2.4 (2.0, 2.9)                                                                    |
| <b>Insurance</b>            |                                                  |                 |                                          |                                                           |                                                                                   |
| Private <sup>†</sup>        |                                                  |                 |                                          |                                                           |                                                                                   |
| Non-private                 | 1.3 (1.1, 1.5)                                   | 1.4 (1.3, 1.5)  | 0.9                                      | 0.7 (0.6, 0.8)                                            | 0.7 (0.6, 0.9)                                                                    |

\* Ratio of selection probability ratio

\*\* Eligible and enrolled participants (EAE)

† Reference group
